# Supplementary material
Source: PubMed Central journal article supplement (PMC7042803)
Supplement: jamadermatol-156-384-s001.pdf [file jamadermatol-156-384-s001.pdf]

## Supplementary Online Content

Bronckers IMGJ, Paller AS, West DP, et al; for the Psoriasis Investigator Group, the Pediatric Dermatology Research Alliance, and the European Working Group on Pediatric Psoriasis. A comparison of psoriasis severity in pediatric patients treated with methotrexate vs biologic agents. *JAMA Dermatol*. Published online February 5, 2020. doi:10.1001/jamadermatol.2019.4835

**eTable 1.** Treatment Episode Characteristics

**eTable 2.** Prescription of MTX and/or Biologics in Patients With Plaque Psoriasis in North America vs. Europe

**eTable 3.** The Odds Ratio of Achieving PGA 0-1 (Left) and PASI75 (Right) With Biologics vs. MTX at Some Point During the 6-Month Follow-up

**eTable 4.** The Mean Reduction in PGA (left) and PASI (Right) Scores With Biologics vs. MTX at Some Point During the 6-Month Follow-up

**eTable 5.** Drug Survival in Patients Treated With MTX vs. Biologics Corrected for Variables That Explained Differences in Drug Survival Between Groups

**eFigure.** Flow Chart of Methotrexate and Biologic Treatment Episodes Available for Determination of Psoriasis Severity (PGA and PASI) and Drug Survival

This supplementary material has been provided by the authors to give readers additional information about their work.

**eFigure. Flow chart of methotrexate and biologic treatment episodes available for determination of psoriasis severity (PGA and PASI) and drug survival.**

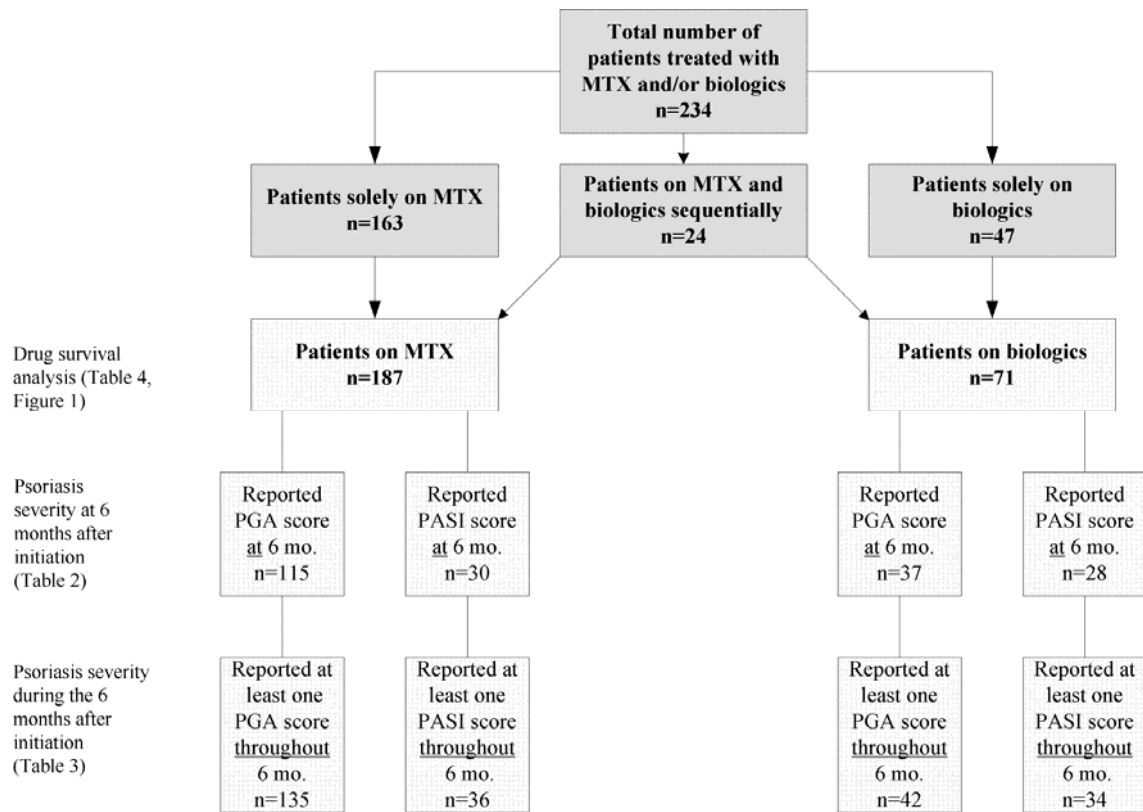

| <b>eTable 1. Treatment episode characteristics (N=258)<sup>a</sup></b>  |                                                                       |                                                                    |                             |
|-------------------------------------------------------------------------|-----------------------------------------------------------------------|--------------------------------------------------------------------|-----------------------------|
| <b>Characteristic</b>                                                   | <b>MTX treatment episodes, No. (%)<sup>b</sup><br/>(N=187, 72.5%)</b> | <b>Biologic treatment, No. (%)<sup>b,c</sup><br/>(N=71, 27.5%)</b> | <b>P- value<sup>d</sup></b> |
| Continent                                                               |                                                                       |                                                                    | 0.118                       |
| North America                                                           | 115 (61.5)                                                            | 37 (52.1)                                                          |                             |
| Europe                                                                  | 72 (38.5)                                                             | 34 (47.9)                                                          |                             |
| Sex                                                                     |                                                                       |                                                                    | 0.595                       |
| Male                                                                    | 86 (46.0)                                                             | 35 (49.3)                                                          |                             |
| Female                                                                  | 101 (54.0)                                                            | 36 (50.7)                                                          |                             |
| Race                                                                    |                                                                       |                                                                    | 0.632                       |
| White                                                                   | 116 (62.0)                                                            | 52 (73.2)                                                          |                             |
| Black or African American                                               | 7 (3.7)                                                               | 1 (1.4)                                                            |                             |
| Asian                                                                   | 5 (2.7)                                                               | 2 (2.8)                                                            |                             |
| Unknown or not reported                                                 | 59 (31.6)                                                             | 16 (22.5)                                                          |                             |
| Ethnicity                                                               |                                                                       |                                                                    | 0.640                       |
| Not Hispanic or Latino                                                  | 83 (44.4)                                                             | 34 (47.9)                                                          |                             |
| Hispanic or Latino                                                      | 18 (9.6)                                                              | 10 (14.1)                                                          |                             |
| Unknown or not reported                                                 | 86 (46.0)                                                             | 27 (38.0)                                                          |                             |
| BMI category (N=119)                                                    | <i>N=86</i>                                                           | <i>N=30</i>                                                        | 0.449                       |
| Underweight                                                             | 6 (7.0)                                                               | 0 (0.0)                                                            |                             |
| Normal weight                                                           | 43 (50.0)                                                             | 15 (50.0)                                                          |                             |
| Overweight                                                              | 11 (12.8)                                                             | 7 (23.3)                                                           |                             |
| Obesity                                                                 | 26 (30.2)                                                             | 8 (26.7)                                                           |                             |
| BMI percentile, mean (SD)                                               | 66.4 (32.1)                                                           | 72.8 (28.1)                                                        | 0.262                       |
| BMI, mean (SD)                                                          | 21.5 (6.2)                                                            | 23.6 (7.4)                                                         | 0.062                       |
| Age at diagnosis, mean (SD), y                                          | 8.6 (3.7)                                                             | 8.7 (3.8)                                                          | 0.724                       |
| Age at start of systemic therapy, mean (SD), y                          | 11.7 (3.6)                                                            | 13.3 (2.9)                                                         | <b>0.000</b>                |
| Disease duration, mean (SD), y                                          | 3.3 (3.4)                                                             | 4.6 (3.3)                                                          | <b>0.003</b>                |
| Treatment duration, mean (SD), y                                        | 1.5 (1.3)                                                             | 1.7 (1.5)                                                          | 0.547                       |
| Naive for systemic medication/ Previously used systemic medication      | 179 (95.7)                                                            | 46 (64.8)                                                          | <b>0.000</b>                |
| Naive for biologic agents/ Previously used biologic agents <sup>d</sup> | 186 (99.5)                                                            | NA                                                                 |                             |
| Naive for methotrexate/ Previously used MTX <sup>e</sup>                | NA                                                                    | 48 (67.6)                                                          |                             |

|                                                                                                                                                                                                                                                                                                                                                                                                                               |
|-------------------------------------------------------------------------------------------------------------------------------------------------------------------------------------------------------------------------------------------------------------------------------------------------------------------------------------------------------------------------------------------------------------------------------|
| Abbreviations: BMI, body mass index (calculated as weight in kilograms divided by height in meters squared); MTX, methotrexate; NA, not applicable.                                                                                                                                                                                                                                                                           |
| <sup>a</sup> All MTX and biologic treatment episodes were included (MTX n=163; biologics n=47, MTX and biologics; n=24). MTX treatment could have been preceded by other conventional systemics or biological agents. Treatment with biologics could have been preceded by conventional systemics (including MTX) or other biological agents. However, patients were treated at any one time with single systemic medication. |
| <sup>b</sup> Data are presented as number (percentage) of patients unless otherwise indicated.                                                                                                                                                                                                                                                                                                                                |
| <sup>c</sup> Etanercept was the most frequently prescribed biologic (n=52; 73.2%) followed by adalimumab (n=14; 19.7%), ustekinumab (n=4; 5.6%) and infliximab (n=1; 1.4%)                                                                                                                                                                                                                                                    |
| <sup>d</sup> Continuous and categorical data are compared by Generalized Estimating Equations to account for dependence of measurements with different systemics used by one patient. The probability of MTX/biologic is estimated as function of the characteristic of interest. Data are presented as No. (%) and mean (SD).                                                                                                |
| <sup>d</sup> Of 187 patients on MTX, 29 switched to a biologic agent (23 of 29 treatment episodes were included in the biologic group of this study) and 1 had previously used a biologic.                                                                                                                                                                                                                                    |
| <sup>e</sup> Of 71 patients on biologics, 23 previously used MTX (23 treatment episodes were included in the MTX group of this study) and 2 switched to MTX (1 of 2 treatment episodes was included in the MTX group of this study).                                                                                                                                                                                          |

| <b>eTable 2. Prescription of MTX and/or biologics in patients with plaque psoriasis in North America vs. Europe (N=234)<sup>a</sup></b>                                                                                            |                                                  |               |                                                                         |               |                                                                                                  |               |                              |               |
|------------------------------------------------------------------------------------------------------------------------------------------------------------------------------------------------------------------------------------|--------------------------------------------------|---------------|-------------------------------------------------------------------------|---------------|--------------------------------------------------------------------------------------------------|---------------|------------------------------|---------------|
| Timeframe of prescription                                                                                                                                                                                                          | No. (%) of patients solely on MTX (N=163, 69.7%) |               | No. (%) of patients solely on biologic agent <sup>b</sup> (N=47, 20.1%) |               | No. (%) of patients treated sequentially with MTX and biologic agent or vice versa (N=24, 10.2%) |               |                              |               |
|                                                                                                                                                                                                                                    |                                                  |               |                                                                         |               | MTX                                                                                              |               | Biologic agents <sup>c</sup> |               |
|                                                                                                                                                                                                                                    | North America (N=111)                            | Europe (N=52) | North America (N=33)                                                    | Europe (N=14) | North America (N=4)                                                                              | Europe (N=20) | North America (N=4)          | Europe (N=20) |
| 12.1990 – etanercept trial <sup>d</sup>                                                                                                                                                                                            | 3 (2.7)                                          | 5 (9.6)       | 1 (3.0)                                                                 | 0 (0.0)       | 0 (0.0)                                                                                          | 0 (0.0)       | 0 (0.0)                      | 0 (0.0)       |
| Inclusion etanercept trial – EMA approval etanercept <sup>e</sup>                                                                                                                                                                  | 23 (20.7)                                        | 5 (9.6)       | 9 (27.3)                                                                | 1 (7.1)       | 0 (0.0)                                                                                          | 6 (30.0)      | 1 (25.0)                     | 1 (5.0)       |
| EMA approval etanercept – 09.2014                                                                                                                                                                                                  | 85 (76.6)                                        | 42 (80.8)     | 23 (69.7)                                                               | 13 (92.9)     | 4 (100.0)                                                                                        | 14 (70.0)     | 3 (75.0)                     | 19 (95.0)     |
| Abbreviations: MTX, methotrexate; EMA, European Medicines Agency.                                                                                                                                                                  |                                                  |               |                                                                         |               |                                                                                                  |               |                              |               |
| <sup>a</sup> Patients could have been previously treated with conventional systemic agents (except for MTX). However, patients were treated at any one time with a single systemic medication.                                     |                                                  |               |                                                                         |               |                                                                                                  |               |                              |               |
| <sup>b</sup> Etanercept was the most frequently prescribed biologic (n=32; 68.1%) followed by adalimumab (n=11; 23.4%), ustekinumab (n=3; 6.4%) and infliximab (n=1, 2.1%).                                                        |                                                  |               |                                                                         |               |                                                                                                  |               |                              |               |
| <sup>c</sup> Etanercept was the most frequently prescribed biologic (n=20; 83.3%) followed by adalimumab (n=3; 12.5%) and ustekinumab (n=1; 4.2%).                                                                                 |                                                  |               |                                                                         |               |                                                                                                  |               |                              |               |
| <sup>d</sup> The etanercept trial started in August, 2004.                                                                                                                                                                         |                                                  |               |                                                                         |               |                                                                                                  |               |                              |               |
| <sup>e</sup> The original approval of etanercept in pediatric plaque psoriasis by the EMA was in December 2008 and the first publication reporting etanercept for pediatric psoriasis appeared in the January, 2008. <sup>16</sup> |                                                  |               |                                                                         |               |                                                                                                  |               |                              |               |

**eTable 3. The odds ratio of achieving PGA 0-1 (left) and PASI75 (right) with biologics vs. MTX at some point during the 6-month follow-up.<sup>a,b,c</sup>**

|                                       | PGA 0/1 (N=177)  |              |              |                              | PASI75 (N=70)    |              |              |
|---------------------------------------|------------------|--------------|--------------|------------------------------|------------------|--------------|--------------|
| Systemic treatment                    | OR               | [CI]         | p-value      | Systemic treatment           | OR               | [CI]         | p-value      |
| Overall odds                          |                  |              |              | Overall odds                 |                  |              |              |
| MTX (N=135)                           | 1<br>[reference] |              |              | MTX (N=36)                   | 1<br>[reference] |              |              |
| Biologic (N=42) <sup>d</sup>          | 2.00             | [0.98-4.00]  | <b>0.056</b> | Biologic (N=34) <sup>e</sup> | 4.56             | [2.02-10.27] | <b>0.000</b> |
| Odds at time points (mo) <sup>f</sup> |                  |              |              | Follow-up (mo) <sup>f</sup>  |                  |              |              |
| 1 mo                                  | 1<br>[reference] |              |              | 1 mo                         | 1<br>[reference] |              |              |
| 3 mo                                  | 2.90             | [1.49-5.62]  | 0.002        | 3 mo                         | 4.49             | [1.87-10.74] | 0.001        |
| 6 mo                                  | 7.20             | [3.81-13.61] | 0.000        | 6 mo                         | 11.58            | [4.17-32.21] | 0.000        |
| Severity score at start <sup>g</sup>  |                  |              |              | Severity score at start      |                  |              |              |
| PGA                                   | 0.45             | [0.29-0.70]  | 0.000        | PGA                          |                  |              |              |
| PASI                                  |                  |              |              | PASI                         | 1.03             | [0.98-1.07]  | 0.260        |

Abbreviations: CI, confidence interval; GEE, General estimating equation; MTX, methotrexate; OR, odds ratio; PASI, psoriasis area and severity index; PGA, physician global assessment.

<sup>a</sup> The relation between medication and severity scores during follow up was studied by GEE modeling. Patients who used MTX and biologics at different times were included in both treatment groups. **Sex, age at treatment start and disease duration** did not influence results and were therefore not included in the model. There was no interaction between follow-up duration and medication.

<sup>b</sup> MTX treatment could have been preceded by other conventional systemics or biological agents. Treatment with biologics could have been preceded by conventional systemics (including MTX) or other biological agents. However, patients were treated at any one time with single systemic medication.

<sup>c</sup> Participating sites provided PASI and/or PGA scores at medication initiation and during at least one follow-up visit. Patient numbers are therefore not identical in both groups. The percentage of missing data is <10% at each specific timepoint.

<sup>d</sup> Etanercept was the most frequently prescribed biologic (n=29; 69.0%) followed by adalimumab (n=10; 23.8%), ustekinumab (n=2; 4.8%) and infliximab (n=1; 2.4%).

<sup>e</sup> Etanercept was the most frequently prescribed biologic (n=25; 73.5%) followed by adalimumab (n=5; 14.7%), ustekinumab (n=4; 11.8%).

<sup>f</sup> Severity scoring had to be available within the 3 months before systemic medication initiation and during at least one follow-up visit at 0-2 months (defined as 1 month follow-up), 2-4 months (defined as 3 month follow-up) or 4-8 months (defined as 6 month follow-up) after treatment initiation.

<sup>g</sup> Severity score at start refers to the corresponding PASI and/or PGA score at medication initiation.

**eTable 4. The mean reduction in PGA (left) and PASI (right) scores with biologics vs. MTX at some point during the 6-month follow-up.**<sup>a,b,c</sup>

|                                      | PGA score (N=177) |              |              |                              | PASI score (N=70) |                |              |
|--------------------------------------|-------------------|--------------|--------------|------------------------------|-------------------|----------------|--------------|
|                                      | Effect            | SD           | p-value      |                              | Effect            | SD             | p-value      |
| <b>Systemic treatment</b>            |                   |              |              | <b>Systemic treatment</b>    |                   |                |              |
| MTX (N=135)                          | 0<br>[reference]  |              |              | MTX (N=36)                   | 0<br>[reference]  |                |              |
| Biologic (N=42) <sup>d</sup>         | -0.31             | -0.56; -0.06 | <b>0.015</b> | Biologic (N=34) <sup>e</sup> | -3.13             | [-4.33; -1.94] | <b>0.000</b> |
| Follow-up (mo) <sup>f</sup>          |                   |              |              | Follow-up (mo) <sup>f</sup>  |                   |                |              |
| 1 mo                                 | 0<br>[reference]  |              |              | 1 mo                         | 0<br>[reference]  |                |              |
| 3 mo                                 | -0.45             | -0.63; -0.27 | 0.000        | 3 mo                         | -2.71             | [-3.99; -1.44] | 0.000        |
| 6 mo                                 | -0.98             | -1.16; -0.80 | 0.000        | 6 mo                         | -3.49             | [-4.75; -2.22] | 0.000        |
| Severity score at start <sup>g</sup> |                   |              |              | Severity score at start      |                   |                |              |
| BSA                                  |                   |              |              | BSA                          |                   |                |              |
| PASI                                 |                   |              |              | PASI                         | 0.35              | [0.26; 0.44]   | 0.000        |
| PGA                                  | 0.54              | 0.37; 0.71   | 0.000        | PGA                          |                   |                |              |

Abbreviations: CI, confidence interval; MTX, methotrexate; PASI, psoriasis area and severity index; PGA, physician global assessment.

<sup>a</sup> The relation between medication and severity scores during follow up was studied by linear mixed modeling. Patients who used MTX and biologics at different times were included in both treatment groups. **Sex, age at treatment start and disease duration** did not influence results and were therefore not included in the model. There was no interaction between follow-up duration and medication.

<sup>b</sup> MTX treatment could have been preceded by other conventional systemics or biological agents. Treatment with biologics could have been preceded by conventional systemics (including MTX) or other biological agents. However, patients were treated at any one time with single systemic medication.

<sup>c</sup> Participating sites provided PASI and/or PGA scores at medication initiation and during at least one follow-up visit. Patient numbers are therefore not identical in both groups. The percentage of missing data is <10% at each specific timepoint.

<sup>d</sup> Etanercept was the most frequently prescribed biologic (n=29; 69.0%) followed by adalimumab (n=10; 23.8%), ustekinumab (n=2; 4.8%) and infliximab (n=1; 2.4%)

<sup>e</sup> Etanercept was the most frequently prescribed biologic (n=25; 73.5%) followed by adalimumab (n=5; 14.7%), ustekinumab (n=4; 11.8%).

<sup>f</sup> Severity scoring had to be available within the 3 months before systemic medication initiation and during at least one return visit at 0-2 months (defined as 1 month follow-up), 2-4 months (defined as 3 month follow-up) or 4-8 months (defined as 6 month follow-up) after treatment initiation.

<sup>g</sup> Severity score at start refers to the corresponding PASI and/or PGA score at medication initiation.

**eTable 5. Drug survival in patients treated with MTX vs. biologics corrected for variables that explained differences in drug survival between groups<sup>a,b,c</sup>**

| Characteristics                                                                                                                                                                                                                                                                                                                   | Event= discontinuation |             |              | Event= discontinuation due to ineffectiveness of systemic agent |             |              | Event= discontinuation due to AE |              |              |
|-----------------------------------------------------------------------------------------------------------------------------------------------------------------------------------------------------------------------------------------------------------------------------------------------------------------------------------|------------------------|-------------|--------------|-----------------------------------------------------------------|-------------|--------------|----------------------------------|--------------|--------------|
|                                                                                                                                                                                                                                                                                                                                   | Hazard ratio           | [95% CI]    | p-value      | Hazard ratio                                                    | [95% CI]    | p-value      | Hazard ratio                     | [95% CI]     | p-value      |
| <b>Systemic agent</b>                                                                                                                                                                                                                                                                                                             |                        |             |              |                                                                 |             |              |                                  |              |              |
| MTX vs. biologic                                                                                                                                                                                                                                                                                                                  | 2.23                   | [1.21-4.10] | <b>0.010</b> | 1.64                                                            | [0.80-3.36] | 0.182        | 4.67                             | [1.08-20.26] | <b>0.039</b> |
| <b>Sex</b>                                                                                                                                                                                                                                                                                                                        |                        |             |              |                                                                 |             |              |                                  |              |              |
| Male vs. female                                                                                                                                                                                                                                                                                                                   | 1.55                   | [0.97-2.49] | 0.067        | 1.57                                                            | [0.85-2.91] | 0.152        | 1.78                             | [0.75-4.21]  | 0.192        |
| Older age at treatment start, yrs <sup>d</sup>                                                                                                                                                                                                                                                                                    | 1.09                   | [1.00-1.19] | <b>0.041</b> | 1.16                                                            | [1.03-1.31] | <b>0.013</b> | 1.01                             | [0.87-1.17]  | 0.916        |
| Longer disease duration, yrs <sup>d</sup>                                                                                                                                                                                                                                                                                         | 1.04                   | [0.96-1.11] | 0.364        | 1.02                                                            | [0.93-1.12] | 0.712        | 1.05                             | [0.92-1.17]  | 0.458        |
| Abbreviations: AE, adverse event; CI, confidence interval; HR, hazard ratio; MTX, methotrexate.                                                                                                                                                                                                                                   |                        |             |              |                                                                 |             |              |                                  |              |              |
| Data are presented as HR with corresponding 95% CI.                                                                                                                                                                                                                                                                               |                        |             |              |                                                                 |             |              |                                  |              |              |
| <sup>a</sup> All MTX (N=187) and biologic (N=71) treatment episodes were included.                                                                                                                                                                                                                                                |                        |             |              |                                                                 |             |              |                                  |              |              |
| <sup>b</sup> Hazard ratios were corrected for variables that explained differences in drug survival between MTX and biologic treated patients.                                                                                                                                                                                    |                        |             |              |                                                                 |             |              |                                  |              |              |
| <sup>c</sup> MTX treatment could have been preceded by other conventional systemics or biological agents. Treatment with biologics could have been preceded by conventional systemics (including MTX) or other biological agents. However, to be included, patients were treated at any one time with single systemic medication. |                        |             |              |                                                                 |             |              |                                  |              |              |
| <sup>d</sup> Age in 1-year intervals, disease duration in 1-year intervals.                                                                                                                                                                                                                                                       |                        |             |              |                                                                 |             |              |                                  |              |              |
